# Supplementary material for: Mechanical stretch regulates macropinocytosis in Hydra vulgaris
Source: bioRxiv or medRxiv preprint supplement (doi:10.1101/2021.12.03.471193), 2021-12-04
Supplement: Supplementary file [file media-1.pdf]

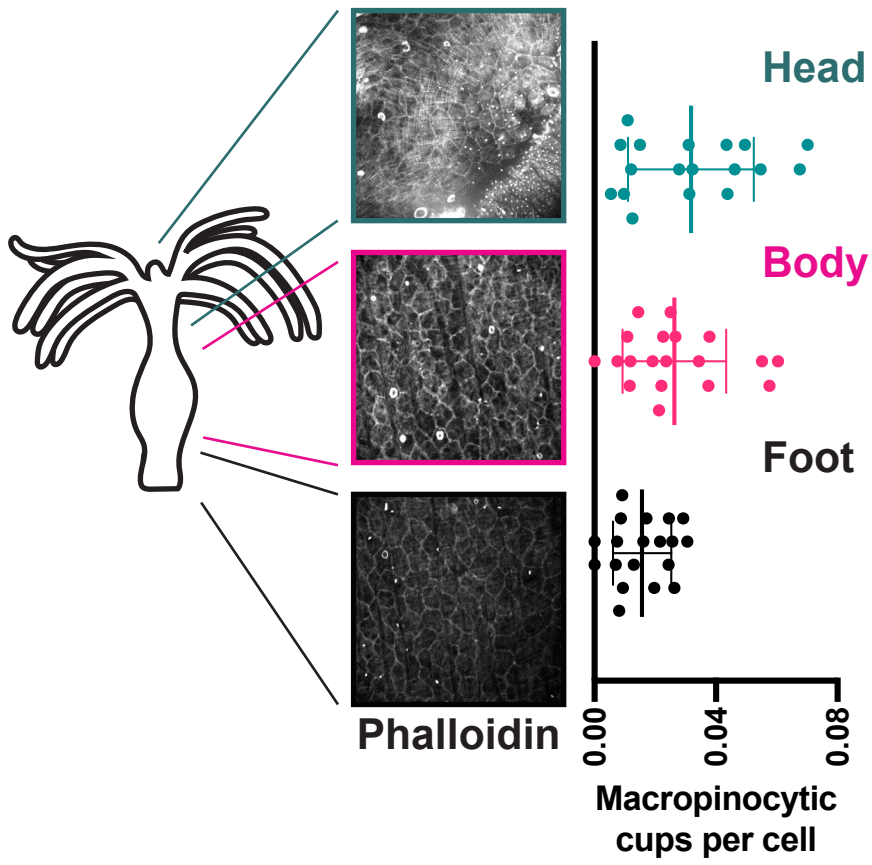

Figure S1.

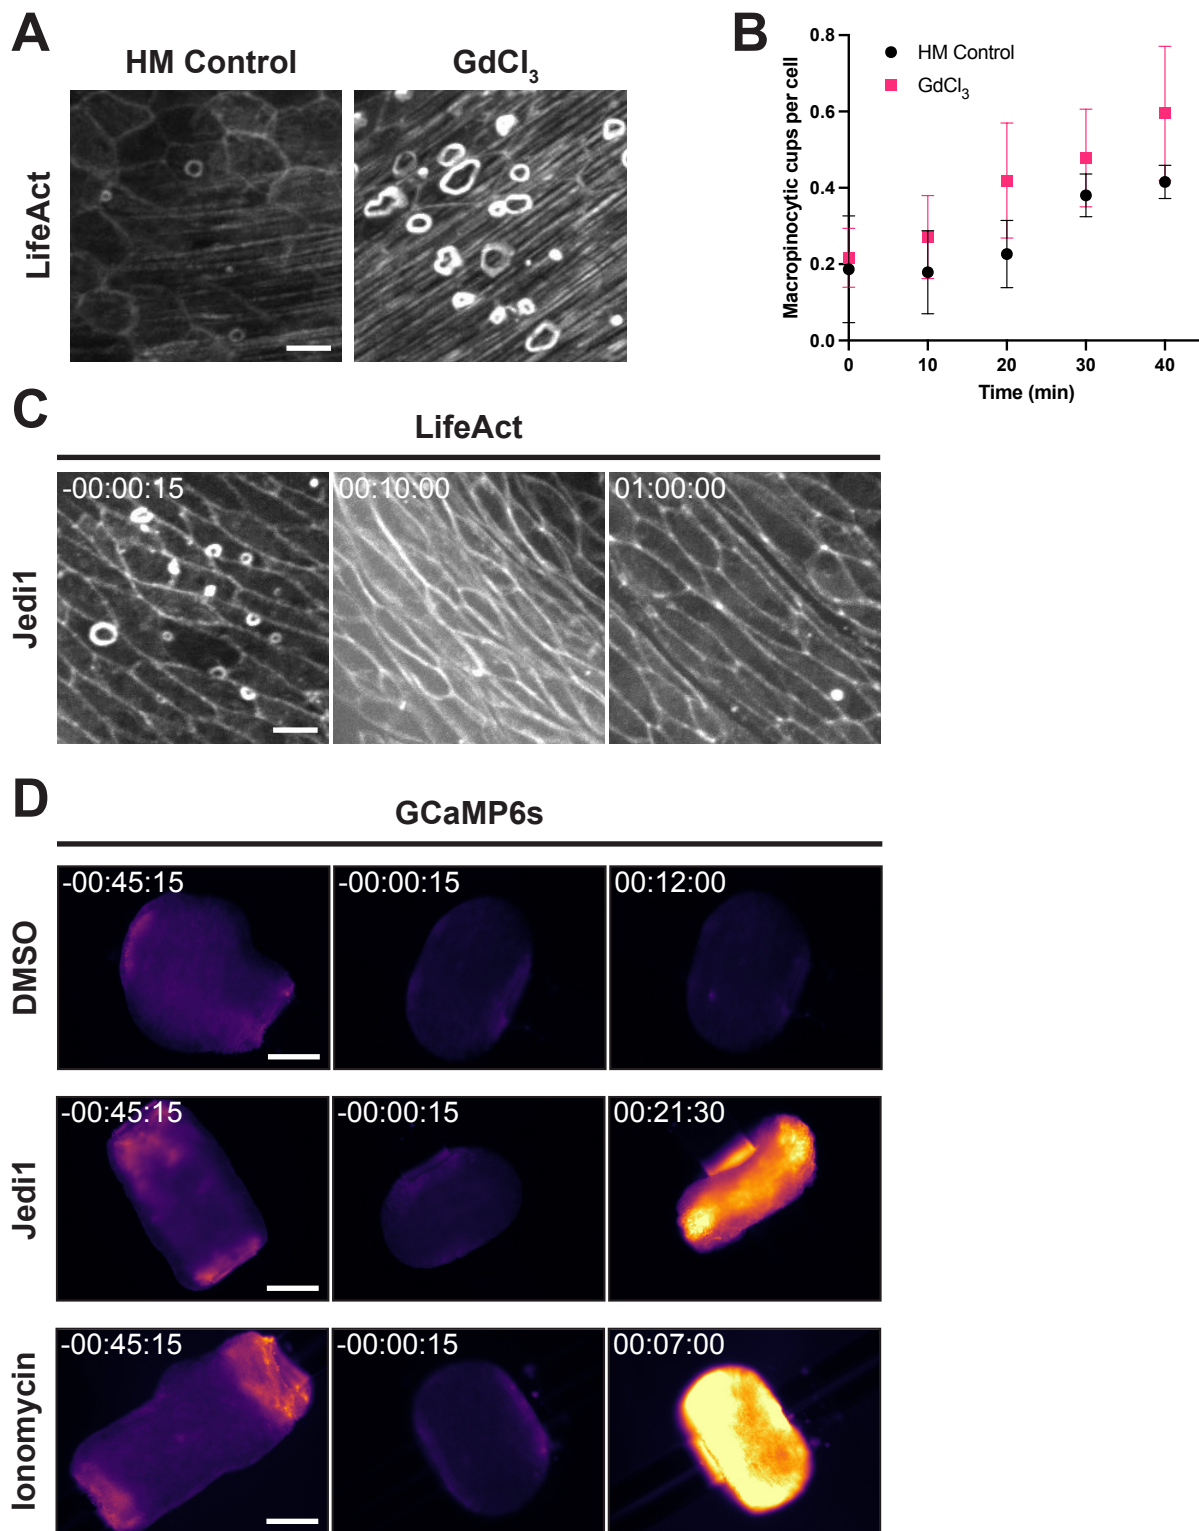

Figure S2.

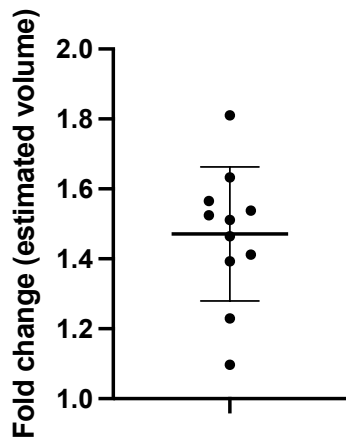

Figure S3.
